# Supplementary material
Source: PubMed Central journal article supplement (PMC3078460)

## Supplementary Fig.2

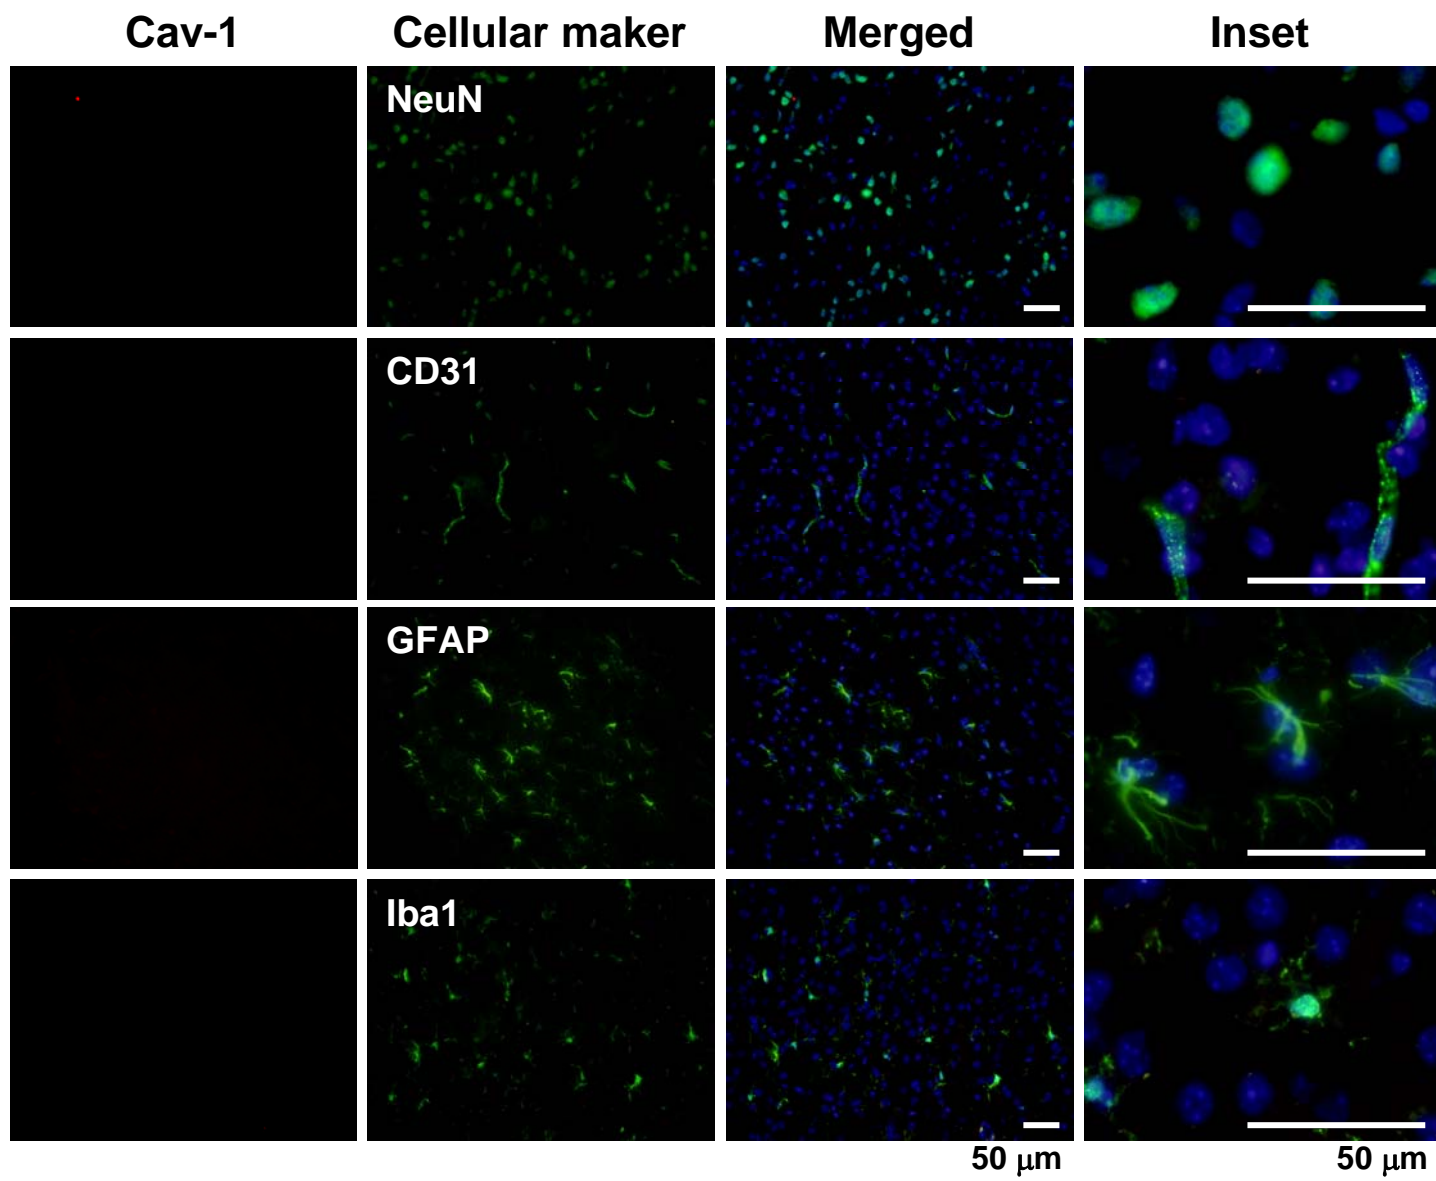

Supplement: mmc2.pdf [file mmc2.pdf]

# Supplementary Fig.3

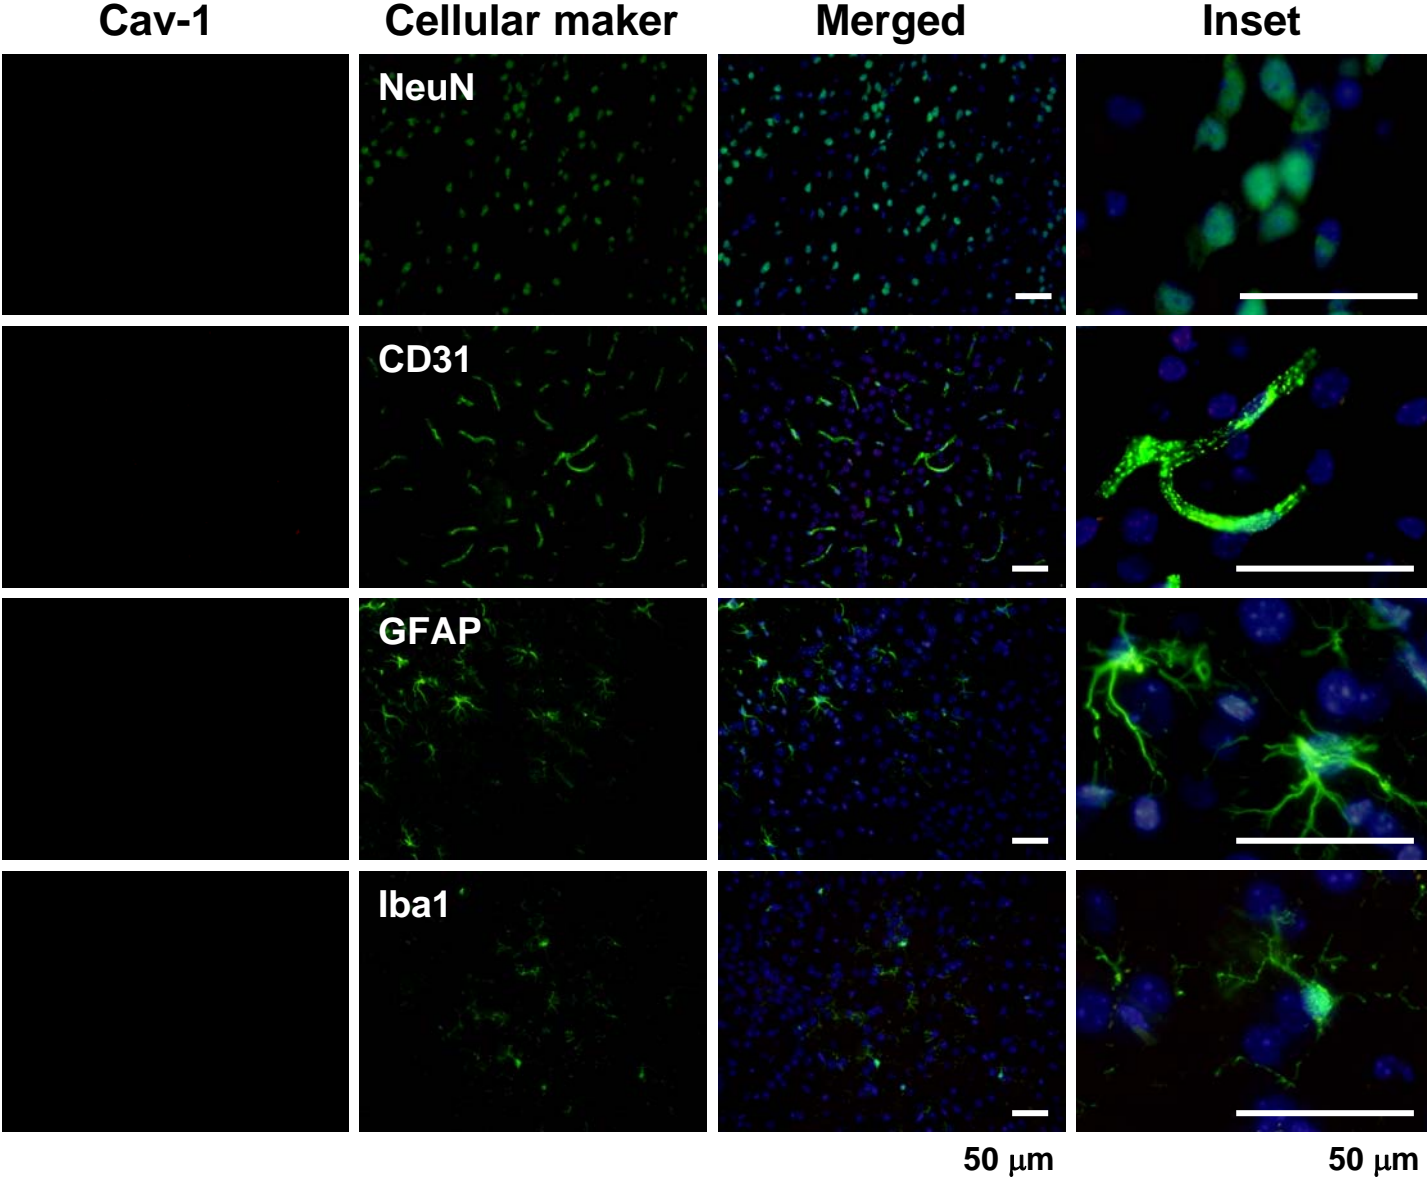

Supplement: mmc3.pdf [file mmc3.pdf]

# Supplementary Fig.4

Normal brain

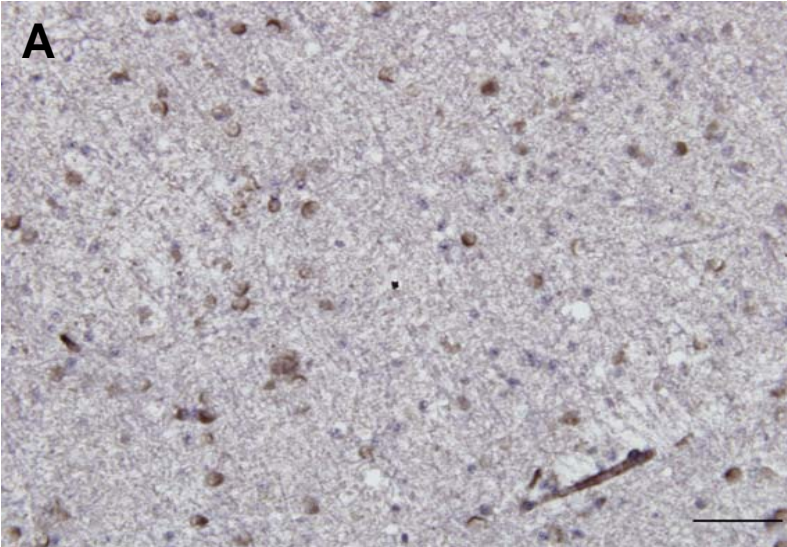

ICH brain

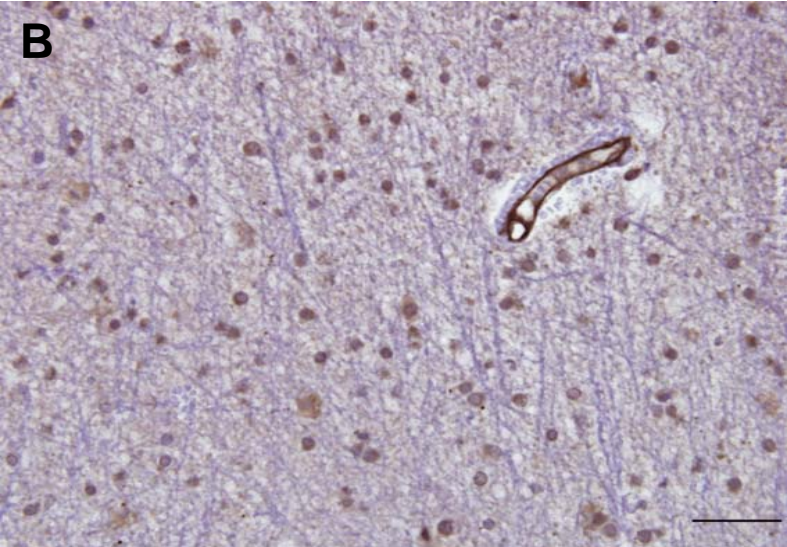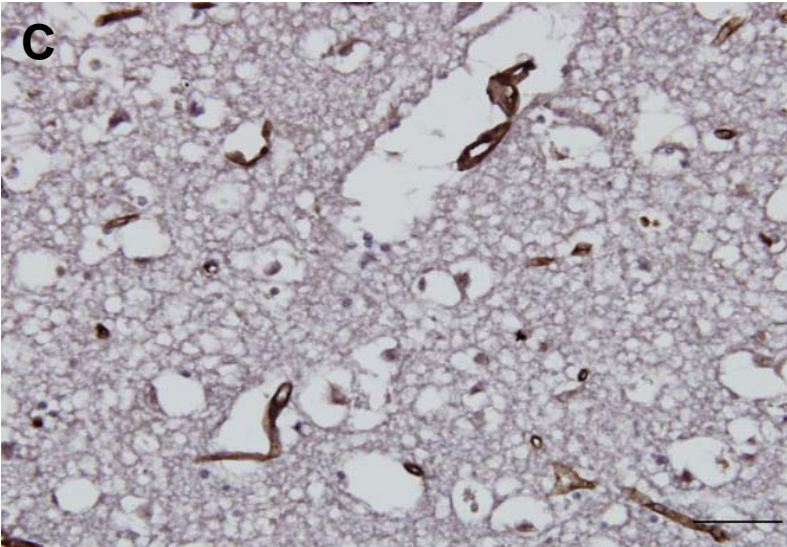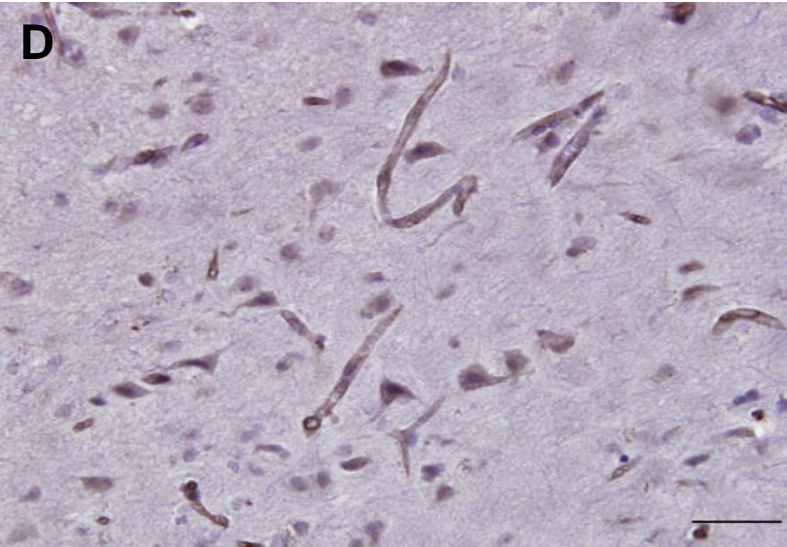

50  $\mu$ m

Supplement: mmc4.pdf [file mmc4.pdf]

# Supplementary Fig.5

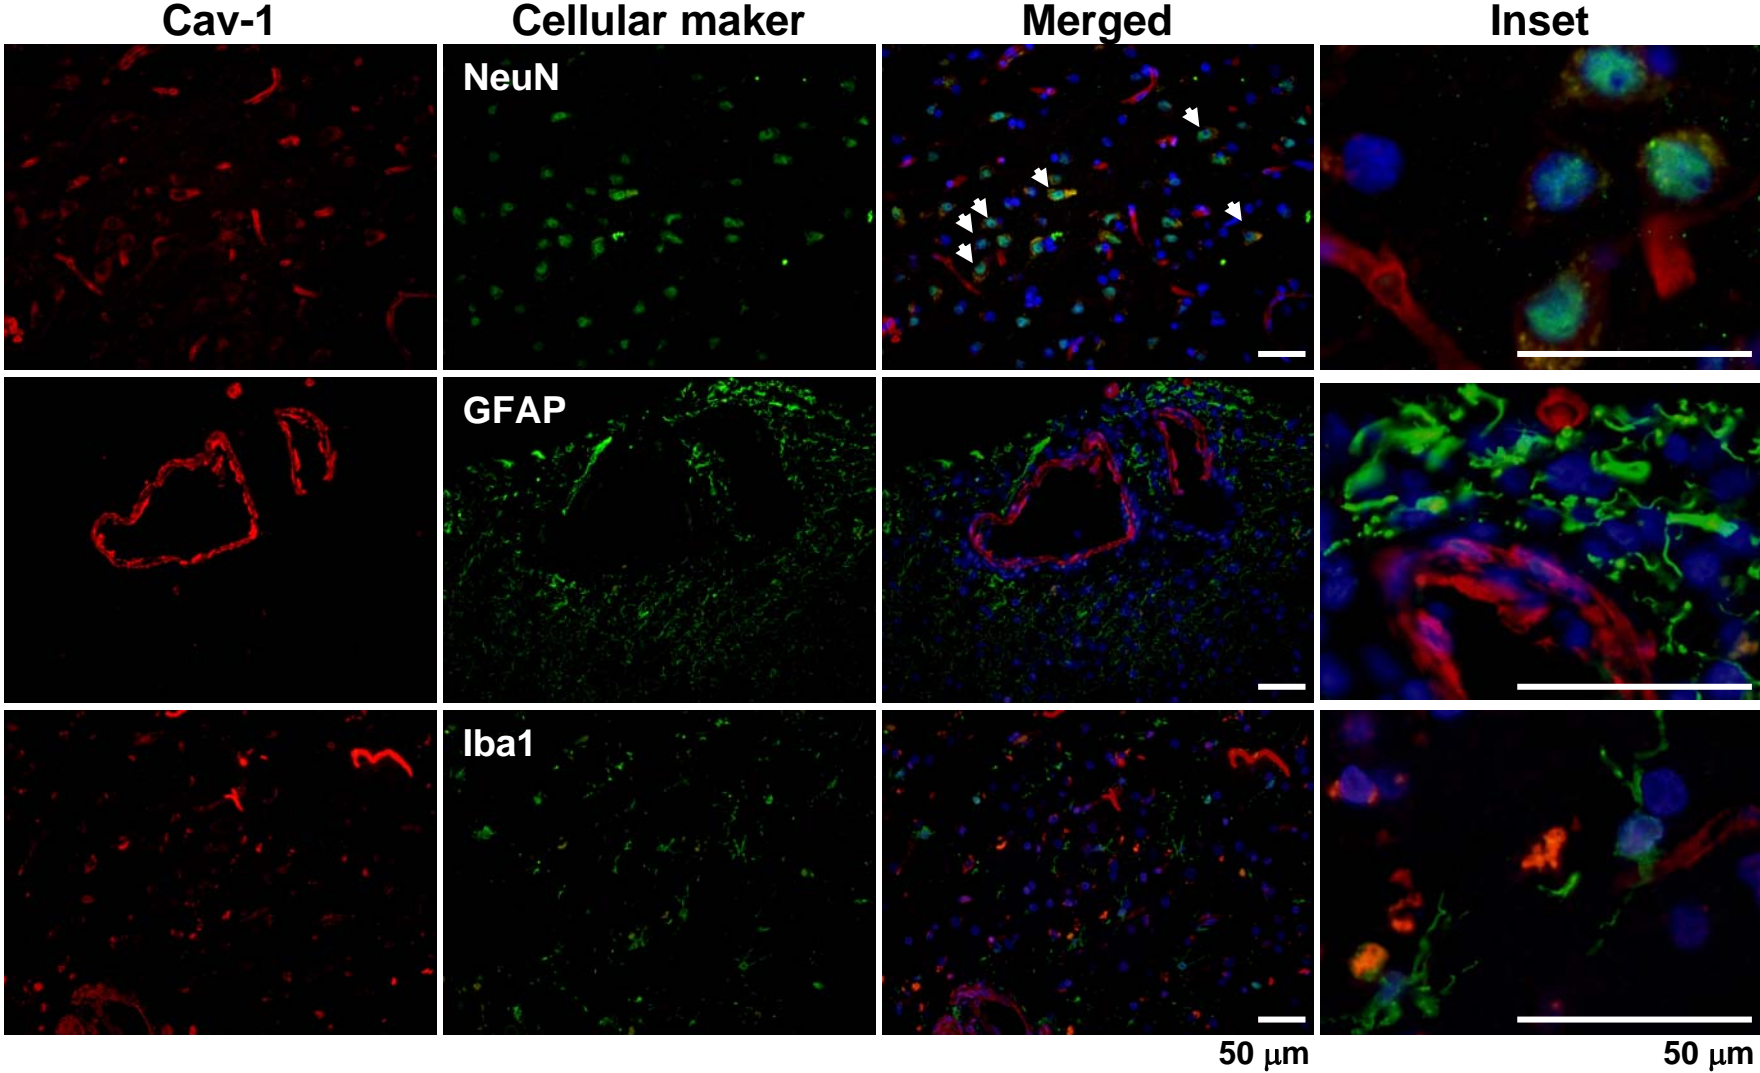

Supplement: mmc5.pdf [file mmc5.pdf]

# Supplementary Fig.6

**A**

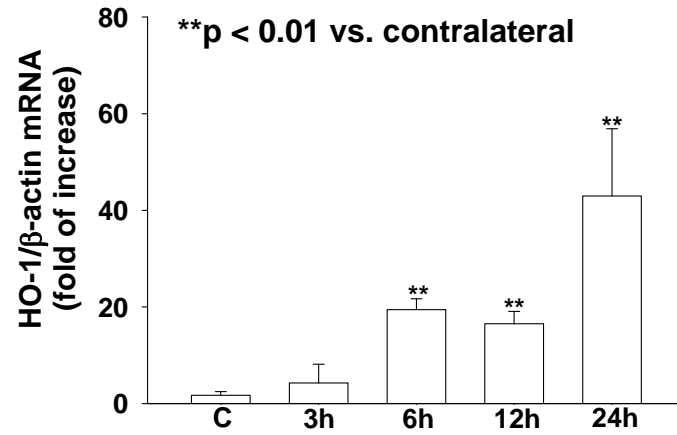

**B**

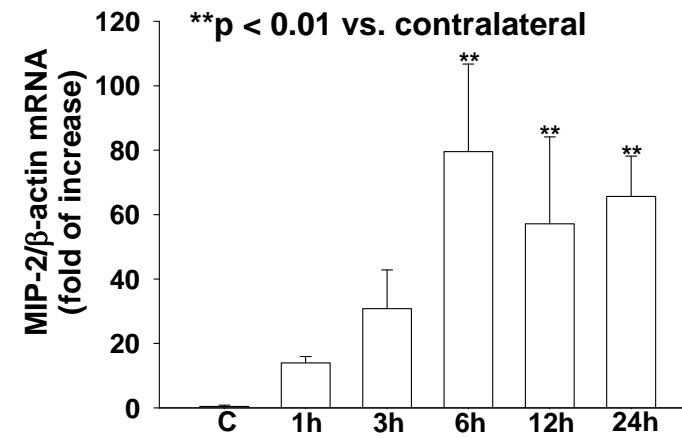

**C**

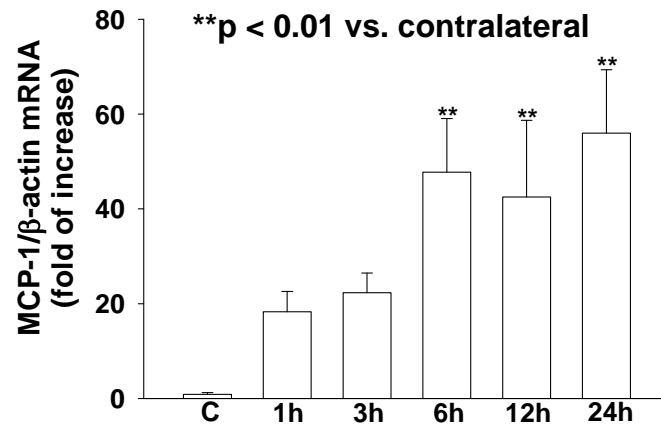

**D**

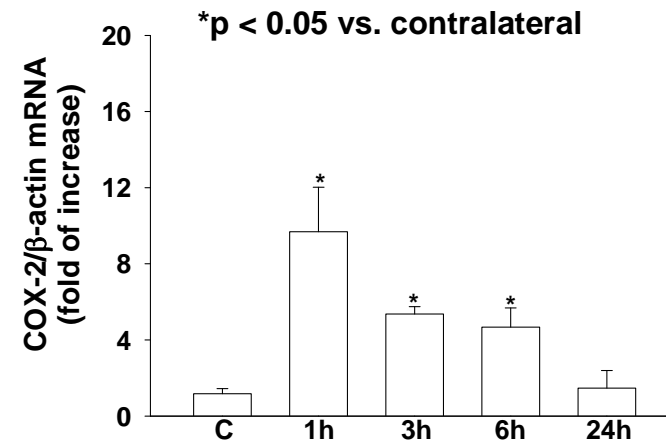

Supplement: mmc6.pdf [file mmc6.pdf]
